# Supplementary material
Source: PubMed Central journal article supplement (PMC11007661)
Supplement: NIHMS1980254-supplement-Supplemental_Table_1__Psychosocial_Measures.pdf [file NIHMS1980254-supplement-Supplemental_Table_1__Psychosocial_Measures.pdf]

## Supplemental Table 1

Baseline and Follow-up psychosocial measures

|                                   | Baseline <i>M(SD)</i> | Follow-up <i>M(SD)</i> |
|-----------------------------------|-----------------------|------------------------|
| <b>HICUPS (Child-report)</b>      | <b>n = 29</b>         | <b>n = 29</b>          |
| Cognitive restructuring           | 32.8 (10.5)           | 34.6 (10.6)            |
| Avoidance                         | 26.9 (7.5)            | 27.2 (7.8)             |
| Support seeking                   | 17.4 (5.6)            | 18.7 (6.2)             |
| <b>PSCQ (Caregiver-report)</b>    | <b>n = 33</b>         | <b>n = 33</b>          |
| Cognitive restructuring           | 72.1 (11.7)           | 71.7 (12.1)            |
| Avoidance                         | 47.1 (12.5)           | 46.1 (11.5)            |
| Support seeking                   | 49.7 (7.5)            | 50.1 (5.8)             |
| <b>PedsQL EoE Module (Child)</b>  | <b>n = 25-29</b>      | <b>n = 25-29</b>       |
| Symptoms I                        | 77.3 (16.8)           | 82.3 (17.6)            |
| Symptoms II                       | 81.0(20.9)            | 79.5 (20.7)            |
| Treatment                         | 72.2 (22.3)           | 68.0 (22.3)            |
| Worry                             | 80.2 (19.1)           | 80.2 (17.8)            |
| Communication                     | 65.7 (17.3)           | 68.2 (14.5)            |
| Food and eating                   | 62.5 (28.0)           | 60.8 (29.2)            |
| Food Feelings                     | 65.7 (25.3)           | 64.4 (23.8)            |
| Total Score                       | 72.5 (13.3)           | 72.4 (14.1)            |
| <b>PedsQL EoE Module (Parent)</b> | <b>n = 29-33</b>      | <b>n = 29-33</b>       |
| Symptoms I                        | 76.8 (20.1)           | 73.8 (22.8)            |
| Symptoms II                       | 76.7 (25.1)           | 70.8 (29.1)            |
| Treatment                         | 74.0 (20.7)           | 67.6 (23.1)            |

---

|                 |             |             |
|-----------------|-------------|-------------|
| Worry           | 67.9 (24.0) | 70.6 (24.9) |
| Communication   | 54.4 (22.4) | 62.6 (20.0) |
| Food and eating | 67.0 (28.9) | 62.1 (24.8) |
| Food Feelings   | 54.3 (30.1) | 54.9 (24.5) |
| Total Score     | 67.9 (19.6) | 65.2 (16.8) |

---

\*How I Coped Under Pressure Scale (HICUPS), Parental Socialization of Coping Questionnaire (PSCQ), Pediatric Quality of Life Inventory 3.0: Eosinophilic Esophagitis Module (PedsQL EoE Module). Data reported on this table includes pre-intervention (baseline; T1) and post-intervention (follow-up; T2). No statistically significant differences were identified on any of these outcome variables.
